# Supplementary material
Source: HighWire-hosted journal article supplement (https://www.cmajopen.ca/highwire/filestream/80836/field_highwire_adjunct_files/1/open-2014-0050-2-at.pdf)
Supplement: open-2014-0050-2-at.pdf [file open-2014-0050-2-at.pdf]

## Appendix 2 (as supplied by authors): Details of included studies

|                       |                                                                                                                                                                                                                                                                                                                                                                                                                                                                                                                                                                                                                                                                                                                                                                                                                                                                                                                                         |
|-----------------------|-----------------------------------------------------------------------------------------------------------------------------------------------------------------------------------------------------------------------------------------------------------------------------------------------------------------------------------------------------------------------------------------------------------------------------------------------------------------------------------------------------------------------------------------------------------------------------------------------------------------------------------------------------------------------------------------------------------------------------------------------------------------------------------------------------------------------------------------------------------------------------------------------------------------------------------------|
| <b>Study/Location</b> | Champagne 2011 [1] United States; Companion paper: Svetkey [2]                                                                                                                                                                                                                                                                                                                                                                                                                                                                                                                                                                                                                                                                                                                                                                                                                                                                          |
| <b>Objective</b>      | To compare two weight loss maintenance interventions with a self-directed control group                                                                                                                                                                                                                                                                                                                                                                                                                                                                                                                                                                                                                                                                                                                                                                                                                                                 |
| <b>Methods</b>        | <p>Design: randomized controlled trial</p> <p>Selection: recruited from 4 medical centres/health research sites in the United States; recruitment included mass mailing, posted flyers, radio advertisements, and print media</p> <p>Inclusion Criteria: <math>\geq 4</math> kg weight loss during phase 1 (weight loss) of the intervention</p> <p>Exclusion Criteria: medication-treated diabetes; recent cardiovascular event; medical or psychiatric conditions preventing full participation; weight loss <math>\geq 9</math> kg in past 3 months; recent use of weight loss medications; prior weight loss surgery</p>                                                                                                                                                                                                                                                                                                            |
| <b>Participants</b>   | <p>Sample: 1,032 (weight maintenance study)</p> <p>Intervention 1 (Internet) n=348; Intervention 2 (Personal Contact) n=342; Control n=342</p> <p>Age, Mean (SD) years (at beginning of weight maintenance study): Intervention 1: 55.7 (8.5); Intervention 2: 55.4 (9.1); Control: 55.8 (8.5)</p> <p>Gender [Female n (%)] (at beginning of weight maintenance study): Intervention 1: 220 (63.2%); Intervention 2: 213 (62.3%); Control: 221 (64.6%)</p> <p>Race/Ethnicity (African American) (at beginning of weight maintenance study): 37.5%</p> <p>SES (Education) (at beginning of weight maintenance study): Some college or less: 37.7%; College: 22.5%; Post-college: 39.9%</p> <p>SES (Income) (at beginning of weight maintenance study): &lt;\$30,000: 7.3%; \$30-59,000: 35.4%; \$60-89,999: 31.3%; <math>\geq</math>\$90,000: 26.1%</p> <p>Loss to follow-up: Intervention 1 n=15; Intervention 2 n=14; Control n=22</p> |
| <b>Intervention</b>   | <p>Description of prior weight loss intervention: followed DASH diet for 6 months (increase intake of fruits, vegetables, low-fat dairy, whole grains); program support delivered in 20 group sessions</p> <p>Description of weight maintenance intervention: 2 strategies for delivering program support: one group received personal contact and the second group received support via interactive technology; both groups encouraged to continue the DASH diet</p> <p>Description of weight maintenance control: self-directed</p> <p>Duration of weight maintenance intervention: 30 months</p> <p>Length of follow-up: immediate post</p>                                                                                                                                                                                                                                                                                          |
| <b>Study/Location</b> | Davidson 1999 [3] United States                                                                                                                                                                                                                                                                                                                                                                                                                                                                                                                                                                                                                                                                                                                                                                                                                                                                                                         |
| <b>Objective</b>      | To test whether orlistat plus a dietary intervention is more effective than placebo plus diet for weight loss and maintenance over two years                                                                                                                                                                                                                                                                                                                                                                                                                                                                                                                                                                                                                                                                                                                                                                                            |
| <b>Methods</b>        | Design: randomized controlled trial                                                                                                                                                                                                                                                                                                                                                                                                                                                                                                                                                                                                                                                                                                                                                                                                                                                                                                     |

|                       |                                                                                                                                                                                                                                                                                                                                                                                                                                                                                                                                                                                                                                                                                                                                                                                                                                                                                                                                                                                                                                                                                                                                   |
|-----------------------|-----------------------------------------------------------------------------------------------------------------------------------------------------------------------------------------------------------------------------------------------------------------------------------------------------------------------------------------------------------------------------------------------------------------------------------------------------------------------------------------------------------------------------------------------------------------------------------------------------------------------------------------------------------------------------------------------------------------------------------------------------------------------------------------------------------------------------------------------------------------------------------------------------------------------------------------------------------------------------------------------------------------------------------------------------------------------------------------------------------------------------------|
|                       | <p>Selection: recruited at 18 clinical research centers in the United States</p> <p>Inclusion Criteria (for weight loss phase): &gt;18 years; BMI 30 to 43; adequate contraception in women of childbearing potential; ≤0.4 kg weight loss in past 3 months</p> <p>Exclusion Criteria: frequently changed smoking habits or stopped smoking in the past 6 months; history or presence of substance abuse or excessive intake of alcohol; significant cardiac, renal, hepatic, gastrointestinal, psychiatric, or endocrine disorders; drug-treated T2D; use of medications that alter appetite or lipid levels</p>                                                                                                                                                                                                                                                                                                                                                                                                                                                                                                                 |
| <b>Participants</b>   | <p>Sample: 576 (weight loss maintenance portion of study) (ITT population randomized in initial weight loss study n=880)</p> <p>Intervention 1 (60 mg orlistat) n=152; Intervention 2 (120 mg orlistat) n=153; Control n=153</p> <p>Age, Mean (SD) years (orlistat recipients at start of weight loss study run-in): 43.3 (0.6)</p> <p>Gender [Female n (%)] (orlistat recipients at start of weight loss study run-in): 544 (82.8%)</p> <p>Race/Ethnicity [n (%)] (orlistat recipients at start of weight loss study run-in): White 534 (81.3%); Black 88 (13.4%); Hispanic 28 (4.3%)</p> <p>Loss to follow-up (over weight loss and weight loss maintenance phases): Intervention 1 n=44; Intervention 2 n=50; Control n=43</p>                                                                                                                                                                                                                                                                                                                                                                                                 |
| <b>Intervention</b>   | <p>Description of prior weight loss intervention: placebo plus a controlled-energy diet during a 4-week lead-in; on day 1 of weight loss study, diet continued and participants randomized to intervention received 120 mg dose of orlistat 3 times a day for 52 weeks; participants randomized to control also continued with the diet but were administered a placebo 3 times daily for 52 weeks</p> <p>Description of weight maintenance intervention: participants previously treated with 120 mg orlistat were randomized to one of two intervention groups (or the control group); intervention group 1 received a 60 mg dose of orlistat 3 times daily plus they followed a weight-maintenance diet; intervention group 2 continued to receive a 120 mg dose of orlistat taken 3 times daily and followed the weight maintenance diet</p> <p>Description of weight maintenance control: control group of patients previously treated with orlistat received placebo plus followed the weight-maintenance diet</p> <p>Duration of weight maintenance intervention: 12 months</p> <p>Length of follow-up: immediate post</p> |
| <b>Study/Location</b> | Hauptman 2000 [4] United States                                                                                                                                                                                                                                                                                                                                                                                                                                                                                                                                                                                                                                                                                                                                                                                                                                                                                                                                                                                                                                                                                                   |
| <b>Objective</b>      | To evaluate the long-term efficacy and tolerability of orlistat for the treatment of obesity within primary care settings                                                                                                                                                                                                                                                                                                                                                                                                                                                                                                                                                                                                                                                                                                                                                                                                                                                                                                                                                                                                         |
| <b>Methods</b>        | <p>Design: randomized controlled trial</p> <p>Selection: recruited from 17 primary care centers in the United States</p> <p>Inclusion Criteria: &gt;18 years; BMI 30 to 44</p>                                                                                                                                                                                                                                                                                                                                                                                                                                                                                                                                                                                                                                                                                                                                                                                                                                                                                                                                                    |

|                       |                                                                                                                                                                                                                                                                                                                                                                                                                                                                                                                                                                                                                                                                                                                                                                                                                                                                                                                                                     |
|-----------------------|-----------------------------------------------------------------------------------------------------------------------------------------------------------------------------------------------------------------------------------------------------------------------------------------------------------------------------------------------------------------------------------------------------------------------------------------------------------------------------------------------------------------------------------------------------------------------------------------------------------------------------------------------------------------------------------------------------------------------------------------------------------------------------------------------------------------------------------------------------------------------------------------------------------------------------------------------------|
|                       | Exclusion Criteria: pregnant, lactating or women not using adequate contraception; weight loss >4 kg during past 3 months; history of significant cardiac, renal, hepatic, or gastrointestinal disorders; uncontrolled hypertension other clinically significant condition; gastrointestinal surgery for weight-reducing purposes; bulimia or laxative and/or substance abuse; abnormal laboratory measures (values $\geq 10\%$ reference value for normal range and requiring medical follow-up); changes in smoking habits in past 6 months; drugs that could affect body weight or food intake 8 weeks prior to screening                                                                                                                                                                                                                                                                                                                        |
| <b>Participants</b>   | <p>Sample: 427 (weight maintenance portion of study)</p> <p>Intervention 1 (60 mg orlistat) n=154; Intervention 2 (120 mg orlistat) n=151; Control n=122</p> <p>Age, Mean (SD) years (prior to run in of weight loss portion of study): Intervention 1: 42.6 (0.8); Intervention 2: 43.2 (0.7); Control: 41.6 (0.7)</p> <p>Gender [Female n (%)] (prior to run in of weight loss portion of study): Intervention 1: 166 (77.9%); Intervention 2: 166 (79.0%); Control: 165 (77.8%)</p> <p>Race/Ethnicity (prior to run in of weight loss portion of study): Intervention 1: White n=200, Black n=9, Hispanic n=2, Other n=2; Intervention 2: White n=184, Black n=19, Hispanic n=6, American Indian n=1; Control: White n=193, Black n=15, Hispanic n=4</p> <p>Loss to follow-up (weight maintenance portion): Intervention 1 n=34; Intervention 2 n=34; Control n=31</p>                                                                           |
| <b>Intervention</b>   | <p>Description of prior weight loss intervention: after a 4-week single-blind, placebo run-in participants randomized to placebo, 60 mg of orlistat, or 120 mg of orlistat, all 3 times daily for 52 weeks; followed a reduced-energy diet from beginning of the run-in and throughout the 52 weeks of treatment; participants in all groups were encouraged to engage in physical activities (e.g., brisk walking 20-30 minutes 3-5 times a week)</p> <p>Description of weight maintenance intervention: participants received the same placebo or drug treatment for a second year in combination with a weight maintenance diet intended to prevent weight regain rather than induce further weight loss</p> <p>Description of weight maintenance control: placebo plus weight maintenance diet (same control group as weight loss)</p> <p>Duration of weight maintenance intervention: 12 months</p> <p>Length of follow-up: immediate post</p> |
| <b>Study/Location</b> | Hill 1999 [5] United States                                                                                                                                                                                                                                                                                                                                                                                                                                                                                                                                                                                                                                                                                                                                                                                                                                                                                                                         |
| <b>Objective</b>      | To test the effectiveness of orlistat against placebo in preventing weight regain                                                                                                                                                                                                                                                                                                                                                                                                                                                                                                                                                                                                                                                                                                                                                                                                                                                                   |
| <b>Methods</b>        | <p>Design: randomized controlled trial</p> <p>Selection: recruited at 17 clinical research centers in the United States</p> <p>Inclusion Criteria: lost <math>\geq 8\%</math> baseline body weight during run-in period</p> <p>Exclusion Criteria: history of significant medical disorders (uncontrolled hypertension, recurrent nephrolithiasis, symptomatic cholelithiasis, active gastrointestinal disorders,</p>                                                                                                                                                                                                                                                                                                                                                                                                                                                                                                                               |

|                       |                                                                                                                                                                                                                                                                                                                                                                                                                                                                                                                                                                                                                                                                                                                                                                                                                                                               |
|-----------------------|---------------------------------------------------------------------------------------------------------------------------------------------------------------------------------------------------------------------------------------------------------------------------------------------------------------------------------------------------------------------------------------------------------------------------------------------------------------------------------------------------------------------------------------------------------------------------------------------------------------------------------------------------------------------------------------------------------------------------------------------------------------------------------------------------------------------------------------------------------------|
|                       | T2D, pancreatic disease, cancer); pregnant or lactating; history or presence of substance abuse or excessive alcohol intake; eating disorders; significantly abnormal laboratory test results; previous gastrointestinal surgery for weight reduction; history of postsurgical adhesions                                                                                                                                                                                                                                                                                                                                                                                                                                                                                                                                                                      |
| <b>Participants</b>   | <p>Sample: 729 (weight maintenance period)</p> <p>Intervention 1 (30 mg orlistat) n=187; Intervention 2 (60 mg orlistat) n=173; Intervention 3 (120 mg orlistat) n=181; Control (placebo) n=188</p> <p>Age Mean (SD) years (at start of 6 month lead in weight loss period): Intervention 1: 46.8 (0.8); Intervention 2: 46.1 (0.7); Intervention 3: 45.9 (0.7); Control: 46.4 (0.7)</p> <p>Gender [Female n (%)] (at start of 6 month lead in weight loss period): Intervention 1: 157 (84.4%); Intervention 2: 136 (79.5%); Intervention 3: 156 (87.1%); Control: 156 (84.8%)</p> <p>Race/Ethnicity (White) (at start of 6 month lead in weight loss period): Intervention 1: n=164; Intervention 2: n=155; Intervention 3: n=153; Control: n=164</p> <p>Loss to follow-up: Intervention 1 n=47; Intervention 2 n=40; Intervention 3 n=55; Control n=50</p> |
| <b>Intervention</b>   | <p>Description of previous weight loss intervention: 6 month dietary intervention involving nutritionally balanced, hypoenergetic diet with a deficit of 4,180 kJ/d; encouraged to engage in physical activity (brisk walking 20-30 minutes 5 times/week)</p> <p>Description of weight maintenance intervention: 3 intervention groups: group 1 30 mg orlistat 3 times/day, group 2 60 mg orlistat 3 times/day, group 3 120 mg orlistat 3 times/day; dietary and behavioural counseling provided throughout treatment period</p> <p>Description of weight maintenance control: placebo and same behavioural components as intervention</p> <p>Duration of weight maintenance intervention: 12 months</p> <p>Length of follow-up: immediate post</p>                                                                                                           |
| <b>Study/Location</b> | Richelsen 2007 [6] Scandinavian Countries                                                                                                                                                                                                                                                                                                                                                                                                                                                                                                                                                                                                                                                                                                                                                                                                                     |
| <b>Objective</b>      | To investigate the efficacy of orlistat on the maintenance of weight following a major diet induced weight loss in obese patients with metabolic risk factors                                                                                                                                                                                                                                                                                                                                                                                                                                                                                                                                                                                                                                                                                                 |
| <b>Methods</b>        | <p>Design: randomized controlled trial</p> <p>Selection: recruited at 9 clinical research centers across Scandinavia</p> <p>Inclusion Criteria: 18-65 years; BMI 30-45; waist circumference <math>\geq 102</math> cm (men) or <math>\geq 92</math> cm (women); <math>\geq 1</math> identified risk factors [impaired fasting glucose (plasma glucose <math>\geq 6.1</math> mmol/L), diet-treated T2D (plasma glucose <math>\geq 7.0</math> mmol/L), dyslipidemia (HDL cholesterol <math>\leq 0.9</math> mmol/L [men] or <math>\leq 1.1</math> [women]), serum triglycerides <math>\geq 2.0</math> mmol/L but <math>&lt; 10.0</math> mmol/L]; loss of <math>\geq 5\%</math> baseline body weight during run-in period</p>                                                                                                                                      |
| <b>Participants</b>   | <p>Sample: 309 (weight maintenance study)</p> <p>Intervention n=153; Control n=156</p>                                                                                                                                                                                                                                                                                                                                                                                                                                                                                                                                                                                                                                                                                                                                                                        |

|                       |                                                                                                                                                                                                                                                                                                                                                                                                                                                                                                                                                                                                                                                                                                                                                                                                                                                                 |
|-----------------------|-----------------------------------------------------------------------------------------------------------------------------------------------------------------------------------------------------------------------------------------------------------------------------------------------------------------------------------------------------------------------------------------------------------------------------------------------------------------------------------------------------------------------------------------------------------------------------------------------------------------------------------------------------------------------------------------------------------------------------------------------------------------------------------------------------------------------------------------------------------------|
|                       | <p>Age, Mean (range) years (after run-in and at randomization for weight maintenance): Intervention: 47.2 (20-64); Control: 46.7 (19-63)</p> <p>Gender [Female n (%)] : Intervention: 77 (50.3%); Control: 80 (51.3%)</p> <p>Loss to follow-up: not reported</p>                                                                                                                                                                                                                                                                                                                                                                                                                                                                                                                                                                                                |
| <b>Intervention</b>   | <p>Description of run-in weight loss intervention: 8 weeks on a very low energy diet of 600 to 800 kcal/day</p> <p>Description of weight maintenance intervention: 120 mg orlistat three times daily; standard energy restricted diet (600 kcal daily deficit); dietitian provided dietary (reduce fat, increase fruit and vegetable intake) and lifestyle (increase physical activity) counseling (monthly for first 18 months, every 3 months thereafter)</p> <p>Description of weight maintenance control: placebo plus the same behavioural components as intervention</p> <p>Duration of weight maintenance intervention: 36 months</p> <p>Length of follow-up: immediate post</p>                                                                                                                                                                         |
| <b>Study/Location</b> | Rickel 2011 [7] United States; Companion papers: Perri [8], Radcliff [9]                                                                                                                                                                                                                                                                                                                                                                                                                                                                                                                                                                                                                                                                                                                                                                                        |
| <b>Objective</b>      | To examine ethnic differences in patterns of weight loss and regain in response to an initial behavioural weight loss intervention followed by extended-care maintenance                                                                                                                                                                                                                                                                                                                                                                                                                                                                                                                                                                                                                                                                                        |
| <b>Methods</b>        | <p>Design: randomized controlled trial</p> <p>Selection: study brochures mailed to 15,000 households in 6 rural counties where program offered; using US Census data mailing list included households with women in the designated age range; those interested invited to orientation session</p> <p>Inclusion Criteria: rural women aged 50 to 75 years; reside in rural counties designated as health professional shortage areas in Florida; BMI &gt;30; weighed &lt;159.1 kg; no uncontrolled hypertension or diabetes; no diagnosis in past year of cardiovascular, cerebrovascular, renal or hepatic disease; completed 6 month initial lifestyle program</p>                                                                                                                                                                                             |
| <b>Participants</b>   | <p>Sample: 234 (weight maintenance period)</p> <p>Intervention 1 (Telephone Counselling) n=72; Intervention 2 (Face-to-face Counselling) n=83; Control (Education) n=79</p> <p>Age, Mean (SD) years (at start of 6 month weight loss intervention): Intervention 1: 59.8 (6.2); Intervention 2: 59.2 (6.2); Control: 58.6 (6.0)</p> <p>Gender (Female): 100%</p> <p>Race/Ethnicity (Black, Hispanic, White, Asian/Native American/Pacific Islander): Intervention 1: 29.2%, 1.4%, 66.7%, 2.8%; Intervention 2: 15.7%, 1.2%, 83.1%, 0%; Control: 11.4%, 3.8%, 81.0%, 3.8%</p> <p>SES (Household Income): Intervention 1: &lt;\$35K 48.6%; \$35&gt;50K 16.7%; \$50&gt;75K 13.9%; ≥\$75K 13.9%; Intervention 2: &lt;\$35K 53%; \$35&lt;50K 21.7%; \$50&lt;75K 16.9%; ≥\$75K 7.2%; Control: &lt;\$35K 31.6%; \$35&lt;50K 26.6%; \$50&lt;75K 22.8%; ≥\$75K 17.7%</p> |

|                       |                                                                                                                                                                                                                                                                                                                                                                                                                                                                                                                                                                                                                                                                                                                                                                                                                                                                                                                                                                                            |
|-----------------------|--------------------------------------------------------------------------------------------------------------------------------------------------------------------------------------------------------------------------------------------------------------------------------------------------------------------------------------------------------------------------------------------------------------------------------------------------------------------------------------------------------------------------------------------------------------------------------------------------------------------------------------------------------------------------------------------------------------------------------------------------------------------------------------------------------------------------------------------------------------------------------------------------------------------------------------------------------------------------------------------|
|                       | Loss to follow-up: no loss                                                                                                                                                                                                                                                                                                                                                                                                                                                                                                                                                                                                                                                                                                                                                                                                                                                                                                                                                                 |
| <b>Intervention</b>   | <p>Description of previous weight loss intervention: 6 month group based lifestyle program (modelled after the Diabetes Prevention Program) including low calorie diet, increased physical activity, goal setting, self-monitoring of food intake, cooking demonstrations, support strategies, techniques for eating healthy away from home</p> <p>Description of weight maintenance interventions: group 1: 26 biweekly face-to-face group counseling sessions lasting 60 minutes each and addressing barriers to diet and exercise behaviours required for weight maintenance; group 2: 26 biweekly one-on-one telephone counseling sessions lasting 15 to 20 minutes each also addressing barriers</p> <p>Description of weight maintenance control: 26 biweekly newsletters containing tips and recipes to help maintain weight loss, sent by mail</p> <p>Duration of weight maintenance intervention: 6 months</p> <p>Length of follow-up: 12 months post intervention completion</p> |
| <b>Study/Location</b> | Sjöström 1998 [10] European Countries                                                                                                                                                                                                                                                                                                                                                                                                                                                                                                                                                                                                                                                                                                                                                                                                                                                                                                                                                      |
| <b>Objective</b>      | To assess the efficacy and tolerability of orlistat in promoting weight loss and preventing weight regain in obese patients                                                                                                                                                                                                                                                                                                                                                                                                                                                                                                                                                                                                                                                                                                                                                                                                                                                                |
| <b>Methods</b>        | <p>Design: randomized controlled trial</p> <p>Selection: recruitment from hospital waiting lists and local advertising</p> <p>Inclusion Criteria: BMI 28-47; <math>\geq 18</math> years; women using adequate contraception; for weight maintenance phase those demonstrating <math>&gt;75\%</math> compliance with treatment</p> <p>Exclusion Criteria: serious diseases (e.g., uncontrolled hypertension, pharmacologically treated diabetes); weight loss <math>&gt;4</math> kg in past 3 months; surgery for weight reduction; history of post-surgical adhesions, bulimia, laxative or drug or alcohol abuse; use of drugs that might have influenced weight or plasma lipids in past month</p>                                                                                                                                                                                                                                                                                       |
| <b>Participants</b>   | <p>Sample: 261</p> <p>Intervention n=133; Control n=126</p> <p>Age, Mean (range) years (at randomization for weight loss intervention): Intervention: 45.2 (20-76); Control: 44.3 (18-77)</p> <p>Gender [Female n (%)] (at randomization for weight loss intervention): Intervention: 284 (82.8%); Control: 283 (83.2%)</p> <p>Loss to follow-up: Intervention n=2; Control n=3</p>                                                                                                                                                                                                                                                                                                                                                                                                                                                                                                                                                                                                        |
| <b>Intervention</b>   | <p>Description of pre-intervention run-in: 4 weeks of placebo taken 3 times daily plus hypocaloric diet</p> <p>Description of one-year weight loss intervention: 120 mg of orlistat three times daily plus continuation of hypocaloric diet</p> <p>Description of weight maintenance intervention: 120 mg orlistat three times daily plus eucaloric (weight maintenance) diet</p>                                                                                                                                                                                                                                                                                                                                                                                                                                                                                                                                                                                                          |

|                       |                                                                                                                                                                                                                                                                                                                                                                                                                                  |
|-----------------------|----------------------------------------------------------------------------------------------------------------------------------------------------------------------------------------------------------------------------------------------------------------------------------------------------------------------------------------------------------------------------------------------------------------------------------|
|                       | <p>Description of control: placebo plus eucaloric diet</p> <p>Duration of intervention: 12 months</p> <p>Length of follow-up: immediate post</p>                                                                                                                                                                                                                                                                                 |
| <b>Study/Location</b> | Thomas 2011 [11] United Kingdom                                                                                                                                                                                                                                                                                                                                                                                                  |
| <b>Objective</b>      | To assess the effects of diet support via e-mail on weight loss maintenance                                                                                                                                                                                                                                                                                                                                                      |
| <b>Methods</b>        | <p>Design: randomized controlled trial</p> <p>Selection: recruited directly from a weight loss clinic led by a dietician (within a Hospital Trust) twice a week</p> <p>Inclusion Criteria: already lost <math>\geq 5\%</math> initial body weight; access to e-mail</p> <p>Exclusion Criteria: applying for bariatric surgery; no e-mail access; taking weight loss medication; binge eating disorder; learning difficulties</p> |
| <b>Participants</b>   | <p>Sample: 55</p> <p>Intervention n=28; Control n=27</p> <p>Age, Mean (SD) years: Intervention: 43.2 (15.2); Control: 46.2 (12.0)</p> <p>Gender: not reported</p> <p>Loss to follow-up: Intervention n=3; Control n=3</p>                                                                                                                                                                                                        |
| <b>Intervention</b>   | <p>Description of weight maintenance intervention: weekly e-mails from dietitian with dietary, behavioural and exercise advice</p> <p>Description of weight maintenance control: no contact with the dietician</p> <p>Duration of weight maintenance intervention: 6 months</p> <p>Length of follow-up: immediate post</p>                                                                                                       |

## References

1. Champagne CM, Broyles ST, Moran LD, Cash KC, Levy EJ, Lin PH, Batch BC, Lien LF, Funk KL, Dalcin A, Loria C, and Myers VH. Dietary intakes associated with successful weight loss and maintenance during the Weight Loss Maintenance trial. *J Am Diet Assoc.* 2011; 111(12): 1826-35. [http://dx.doi.org/S0002-8223\(11\)01556-2](http://dx.doi.org/S0002-8223(11)01556-2) [pii];10.1016/j.jada.2011.09.014 [doi].
2. Svetkey LP, Stevens VJ, Brantley PJ, Appel LJ, Hollis JF, Loria CM, Vollmer WM, Gullion CM, Funk K, Smith P, Samuel-Hodge C, Myers V, Lien LF, Laferriere D, Kennedy B, Jerome GJ, Heinith F, Harsha DW, Evans P, Erlinger TP, Dalcin AT, Coughlin J, Charleston J, Champagne CM, Bauck A, Ard JD, and Aicher K. Comparison of strategies for sustaining weight loss: the weight loss maintenance randomized controlled trial. *JAMA.* 2008; 299(10): 1139-48. <http://dx.doi.org/299/10/1139> [pii];10.1001/jama.299.10.1139 [doi].
3. Davidson MH, Hauptman J, DiGirolamo M, Foreyt JP, Halsted CH, Heber D, Heimbarger DC, Lucas CP, Robbins DC, Chung J, and Heymsfield SB. Weight control and risk factor reduction in obese subjects treated for 2 years with orlistat: a randomized controlled trial. *JAMA.* 1999; 281(3): 235-42. <http://dx.doi.org/joc80835> [pii].
4. Hauptman J, Lucas C, Boldrin MN, Collins H, and Segal KR. Orlistat in the long-term treatment of obesity in primary care settings. *Arch Fam Med.* 2000; 9(2): 160-7.
5. Hill JO, Hauptman J, Anderson JW, Fujioka K, O'Neil PM, Smith DK, Zavoral JH, and Aronne LJ. Orlistat, a lipase inhibitor, for weight maintenance after conventional dieting: a 1-y study. *Am J Clin Nutr.* 1999; 69(6): 1108-16.
6. Richelsen B, Tonstad S, Rossner S, Toubro S, Niskanen L, Madsbad S, Mustajoki P, and Rissanen A. Effect of orlistat on weight regain and cardiovascular risk factors following a very-low-energy diet in abdominally obese patients: a 3-year randomized, placebo-controlled study. *Diabetes care.* 2007; 30(1): 27-32. <http://dx.doi.org/30/1/27> [pii];10.2337/dc06-0210 [doi].
7. Rickel KA, Milsom VA, Ross KM, Hoover VJ, Peterson ND, and Perri MG. Differential response of African American and Caucasian women to extended-care programs for obesity management. *Ethn Dis.* 2011; 21(2): 170-5.
8. Perri MG, Limacher MC, Durning PE, Janicke DM, Lutes LD, Bobroff LB, Dale MS, Daniels MJ, Radcliff TA, and Martin AD. Extended-care programs for weight management in rural communities: the treatment of obesity in underserved rural settings (TOURS) randomized trial. *Arch Intern Med.* 2008; 168(21): 2347-54. <http://dx.doi.org/10.1001/archinte.168.21.2347>.
9. Radcliff TA, Bobroff LB, Lutes LD, Durning PE, Daniels MJ, Limacher MC, Janicke DM, Martin AD, and Perri MG. Comparing costs of telephone vs face-to-face extended-care programs for the management of obesity in rural settings. *J Acad Nutr Diet.* 2012; 112(9): 1363-73.



10. Sjöström L, Rissanen A, Andersen T, Boldrin M, Golay A, Koppeschaar HP, and Krempf M. Randomised placebo-controlled trial of orlistat for weight loss and prevention of weight regain in obese patients. European Multicentre Orlistat Study Group. *Lancet*. 1998; 352(9123): 167-72. <http://dx.doi.org/S0140673697115094> [pii].
11. Thomas D, Vydelingum V, and Lawrence J. E-mail contact as an effective strategy in the maintenance of weight loss in adults. *J Hum Nutr Diet*. 2011; 24(1): 32-8.
